# Supplementary material for: Whole-Blood Gene Expression Profile After Hypoxic-Ischemic Encephalopathy
Source: PubMed Central journal article supplement (PMC10837749; doi:10.1001/jamanetworkopen.2023.54433), 2024-02-02
Supplement: jamanetwopen-e2354433-s003.pdf [file jamanetwopen-e2354433-s003.pdf]

## Data Sharing Statement

Montaldo. Whole-Blood Gene Expression Profile After Hypoxic-Ischemic Encephalopathy. *JAMA Netw Open*. Published February 02, 2024. doi:10.1001/jamanetworkopen.2023.54433

### Data

**Data available:** No

### Additional Information

**Explanation for why data not available:** Data used the study can be accessed from the published supplementary files
